# Supplementary material
Source: publisher figshare collection journal article supplement (https://karger.figshare.com/articles/dataset/_/13385144)
Supplement: Supplementary file 1 [file 1]

**Supplemental Material**

**
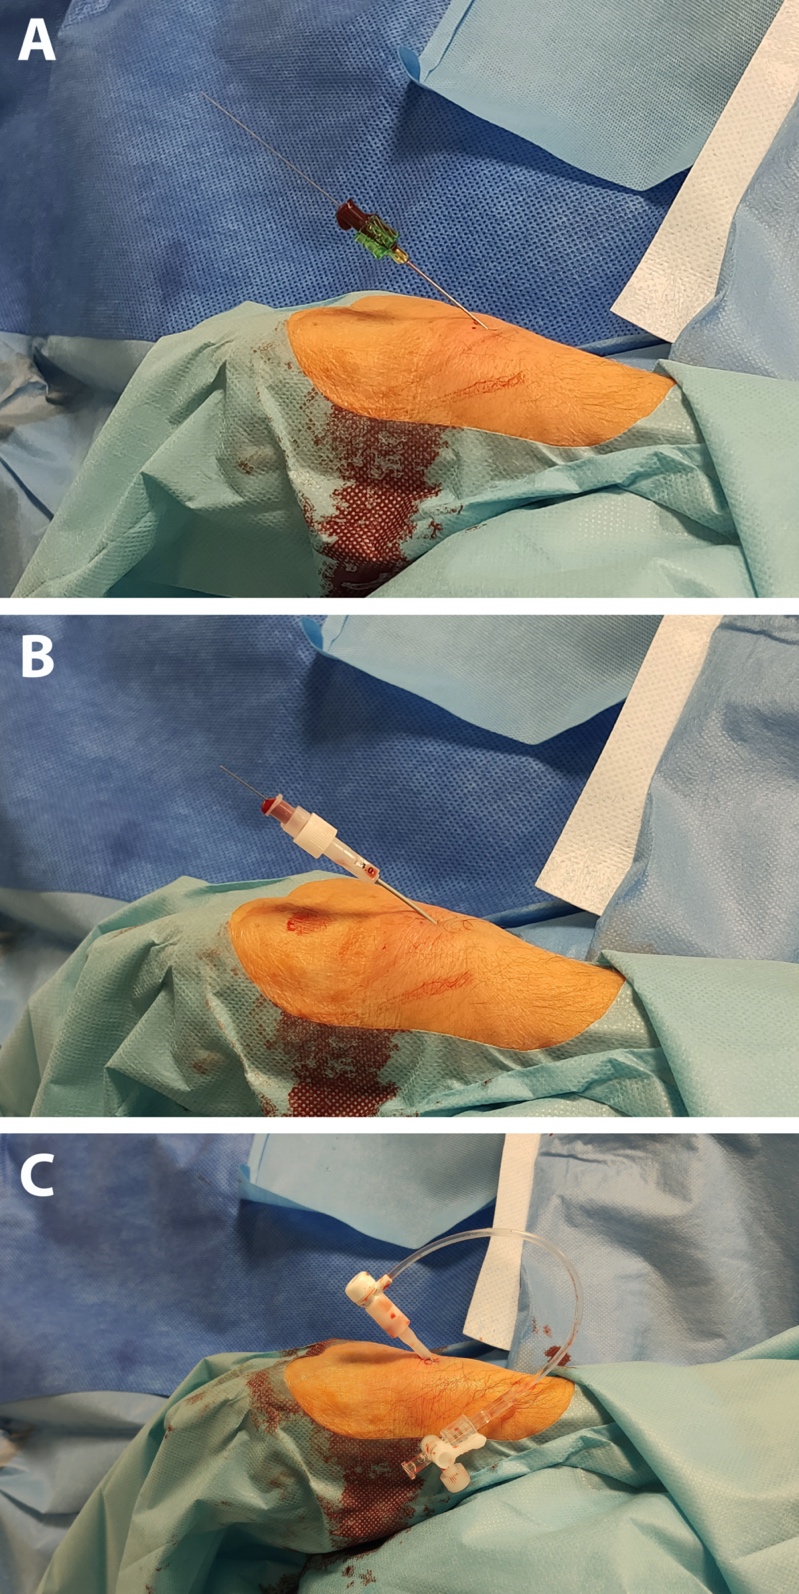
**

**Supplemental Figure 1. A -** dRA puncture with a 21G x 4cm needle followed by wiring. If there is wiring resistance, instead of partially advancing a potentially traumatic standard radial introducer, a 7cm Micropuncture Pedal Introducer could be inserted. **B** - Intraluminal (dRA) Micropuncture Pedal Introducer and guidewire in place. **C** - Micropuncture Pedal Introducer connected to the CheckFlo® haemostasis valve in order to perform radial artery angiography and heamodynamic assessment.


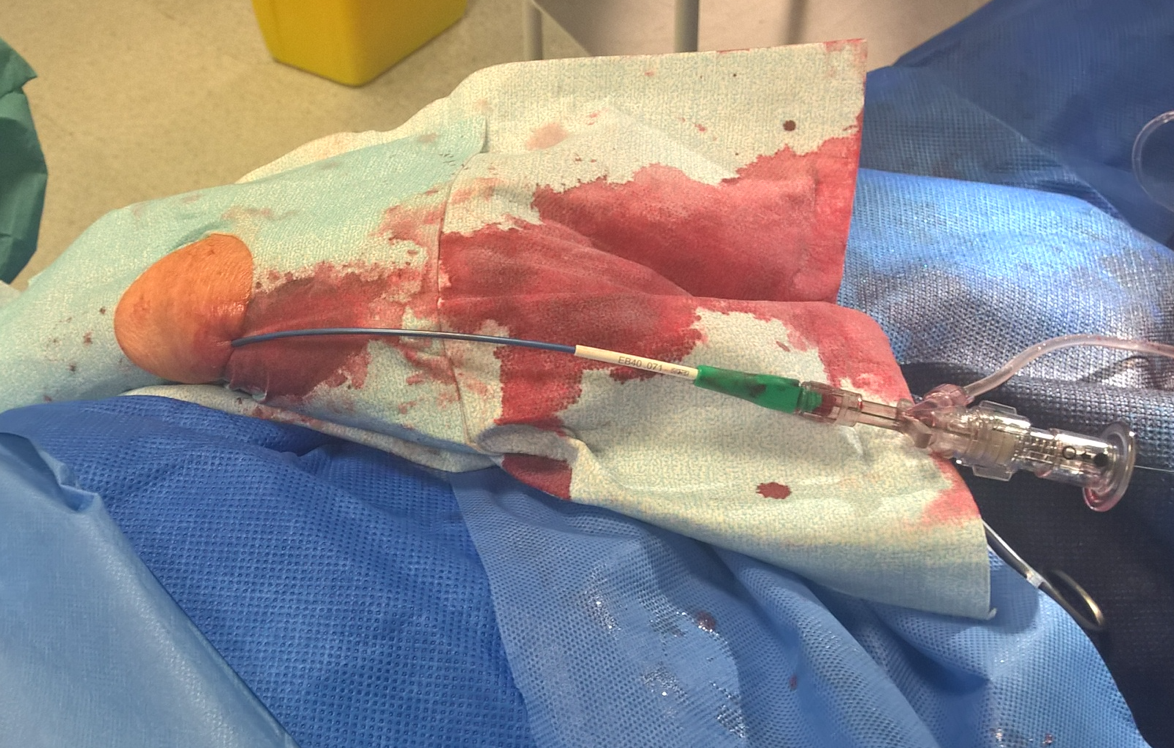


**Supplemental Figure 2**. Sheathless guide catheter via dRA for coronary intervention.
